# Supplementary material for: Lyophyllum decastesfruiting body polysaccharide alleviates acute liver injury by activating the Nrf2 signaling pathway
Source: Royal Society of Chemistry journal article supplement (doi:10.1039/d1fo01701b), 2021-11-05
Supplement: d1fo01701b1.pdf [file d1fo01701b1.pdf]

## Supporting information

### The protective mechanism of *Lyophyllum decastes* fruiting body polysaccharide on acute liver injury through activation of the Nrf2 signaling pathway

Fengpei Zhang<sup>a,b</sup>, Hui Xu<sup>a,b</sup>, Yuan Yuan<sup>a,b</sup>, Haichen Huang<sup>a,b</sup>, Xiaoping Wu<sup>a,b</sup>, Junli Zhang<sup>c\*</sup> and Junsheng Fu<sup>a,b\*</sup>

a. College of Life Science, Fujian Agriculture and Forestry University, Fuzhou 350002, Fujian, People's Republic of China.

b. Mycological Research Canter, College of Life Sciences, Fujian Agriculture and Forestry University, Fuzhou, 350002, People's Republic of China.

c. Tibet Academy of Agricultural and Animal Husbandry Sciences, Lhasa, Tibet 850000, People's Republic of China.

\*Corresponding authors. Junsheng Fu, Tel: +0591 83789367, E-mail: [fujunsheng81@163.com](mailto:fujunsheng81@163.com); Junli Zhang, Email: 594686187@qq.com.

**Table 1 Primers for qPCR**

| Primer name        | Primer sequence           | Primer name    | Primer sequence             |
|--------------------|---------------------------|----------------|-----------------------------|
| GAPDH antisense    | F-AACGACCCCTTCATTGAC      | NF- $\kappa$ B | F-GATTCGTTCCGTTATGT         |
| GAPDH sense        | R-TCCACGACATACTCAGCAC     | NF- $\kappa$ B | R-TTTGCTGGTCCCACATAG        |
| Nrf2 antisense     | F-TCTCCTCGCTGGAAAAAGAA    | TLR4           | F-GTGGAAGTTGAACGAATGGA      |
| Nrf2 sense         | R-AATGTGCTGGCTGTGCTTTA    | TLR4           | R-TGGATGATGTTGGCAGCA        |
| CuZn-SOD antisense | F-AAGGCCGTGTGCGTGCTGAA    | TNF- $\alpha$  | F-CAGGCGGTGCCTATGTCTC       |
| CuZn-SOD sense     | R-CAGGTCTCCAACATGCCTCT    | TNF- $\alpha$  | R-CGATCACCCGAAGTTCAGTAG     |
| HO-1               | F-CAGAAGAGGCTAAGACCGCCTT  | IL-6           | F-TGGAGTCACAGAAGGAGTGGCTAAG |
| HO-1               | R-TCTGGTCTTTGTGTTCTCTGTCA | IL-6           | R-TCTGACCACAGTGAGGAATGTCCAC |
| Keap-1Upstream     | F-GTGCTGCATGTGATGAACGG    |                |                             |
| Keap-1Downstream   | R-AAGAACTCCTCCTCCCGAA     |                |                             |

**Table2 Effects of LDFP on mouse body weight(g)**

| Treatment group | First day weight   | Third day weight   | Fifth day weight   | Seventh day weight |
|-----------------|--------------------|--------------------|--------------------|--------------------|
| Control         | 27.443 $\pm$ 1.200 | 27.417 $\pm$ 1.050 | 26.21 $\pm$ 2.246  | 25.59 $\pm$ 2.244  |
| Model           | 25.976 $\pm$ 1.794 | 25.654 $\pm$ 1.886 | 24.98 $\pm$ 1.280  | 26.345 $\pm$ 1.602 |
| L-LDFP          | 27.662 $\pm$ 0.814 | 27.956 $\pm$ 0.681 | 27.558 $\pm$ 1.071 | 27.257 $\pm$ 0.928 |
| M-LDFP          | 28.116 $\pm$ 0.555 | 26.943 $\pm$ 0.994 | 26.805 $\pm$ 0.952 | 27.99 $\pm$ 0.693  |
| H-LDFP          | 26.206 $\pm$ 1.115 | 25.84 $\pm$ 0.949  | 24.853 $\pm$ 0.781 | 25.3 $\pm$ 1.700   |
| Positive        | 26.564 $\pm$ 1.504 | 25.563 $\pm$ 2.081 | 25.963 $\pm$ 1.652 | 26.123 $\pm$ 2.240 |

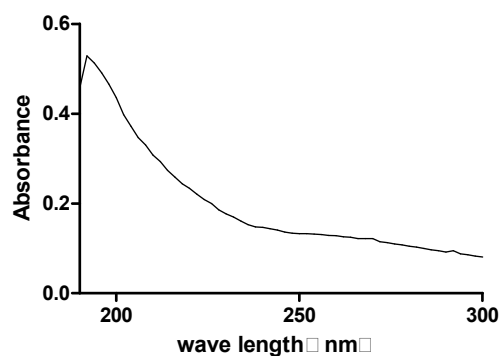

Fig.1 UV-Vis absorption spectrum of LDFP

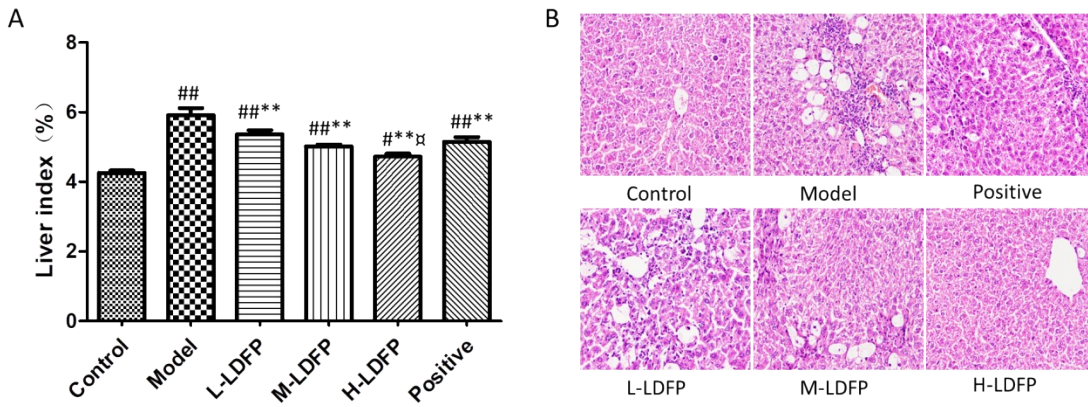

Fig. 2(A) Effect of LDFP on liver index of mice, compared with blank group #:  $P < 0.05$ ; ##:  $P < 0.01$ ; Compared with model group \*  $P < 0.05$ ; \*\*  $P < 0.01$ ; Compared with the positive group  $\alpha$   $P < 0.05$ ;  $\alpha\alpha$   $P < 0.01$ . (B): HE staining of liver section

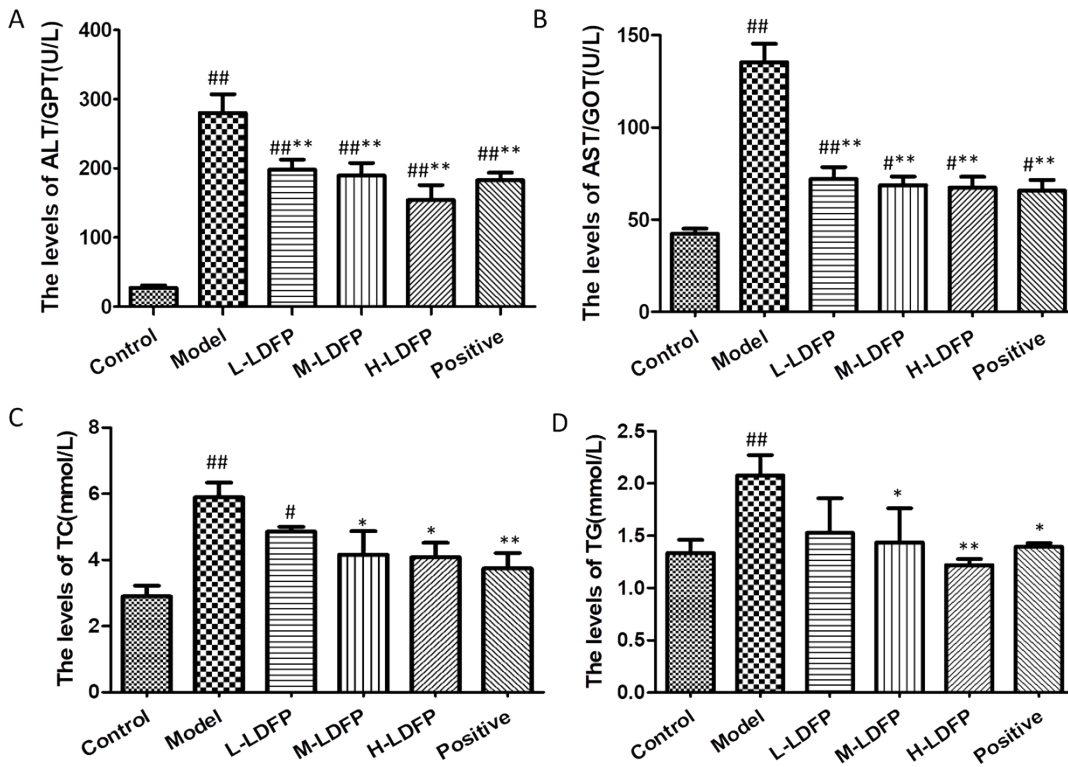

Fig. 3 Effects of LDFP on the contents of ALT, AST, TC and TG in serum of mice. A: ALT; B: AST; C: TC; D: TG. Compared with blank group #  $P < 0.05$ ; ##  $P < 0.01$ ; Compared with model group \*  $P < 0.05$ ; \*\*  $P < 0.01$

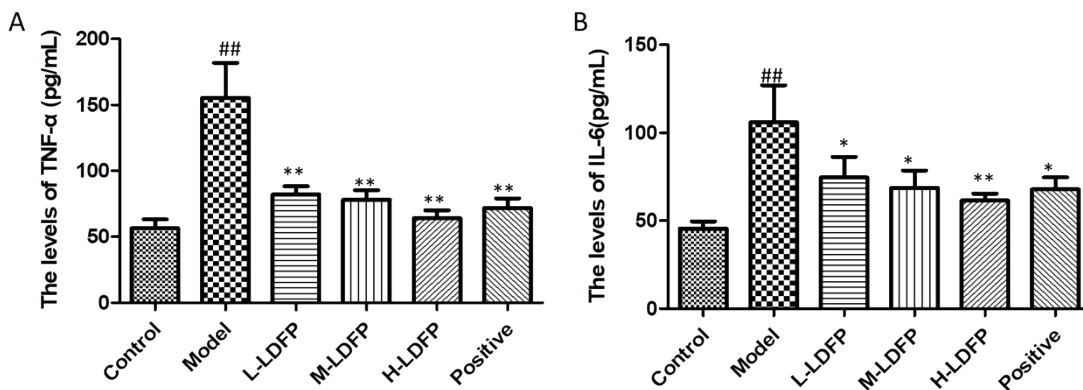

Fig. 4 Effects of LDFP on the contents of inflammatory cytokines. TNF- $\alpha$  and IL-6 in serum of mice A: TNF- $\alpha$ ; B: IL - 6. Compared with blank group #P<0. 05; ## P < 0. 01; Compared with model group \*P<0. 05; \*\* P < 0. 01

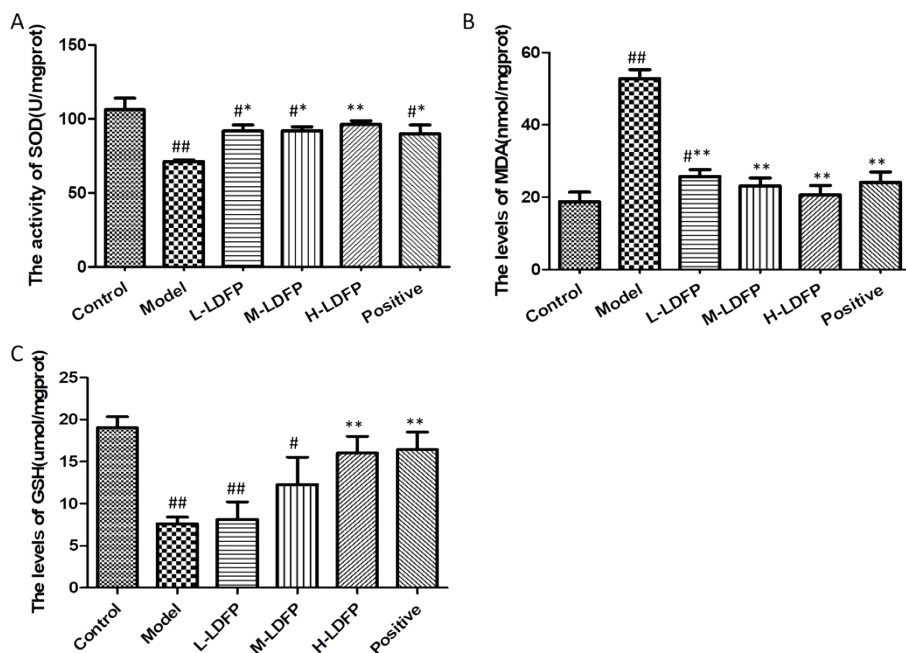

Fig. 5 Effects of LDFP on the activities of SOD, MDA and GSH enzymes in the liver of mice. A: SOD; B: MDA; C: GSH. Compared with blank group #P<0. 05; ## P < 0. 01; Compared with model group \*P<0. 05; \*\* P < 0. 01

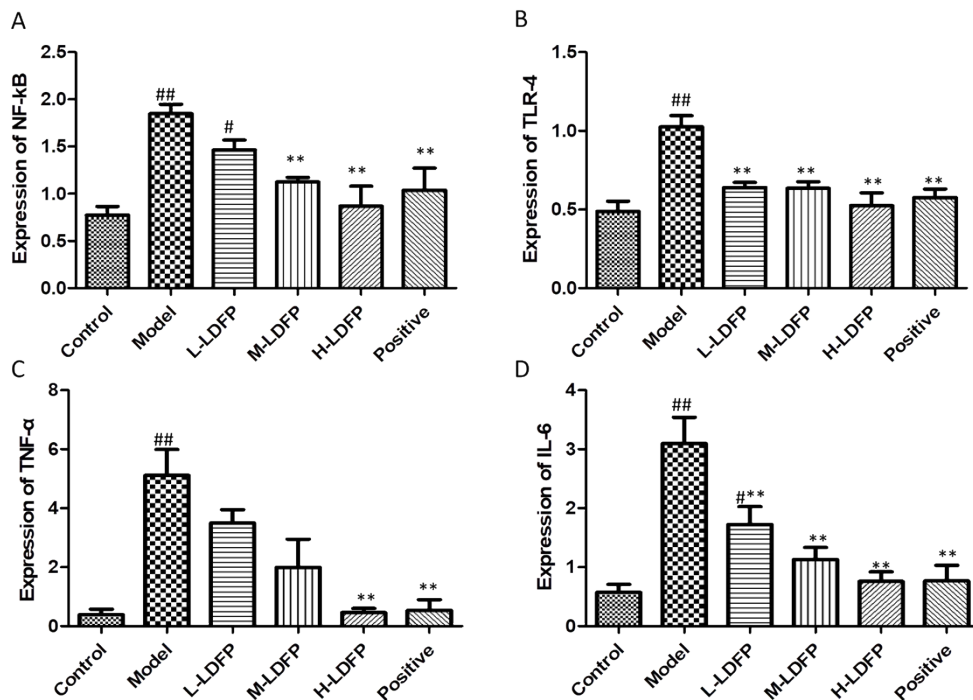

Fig. 6 Gene expression levels of TLR-4 and Nrf2 pathways. A: NF- $\kappa$ B; B: TLR-4; C: TNF- $\alpha$ ; D: IL - 6; E: Nrf2; F: Keap1; G: HO-1; H: CuZn-SOD. Compared with blank group #P<0. 05; ## P < 0. 01; Compared with model group \*P<0. 05; \*\* P < 0. 01

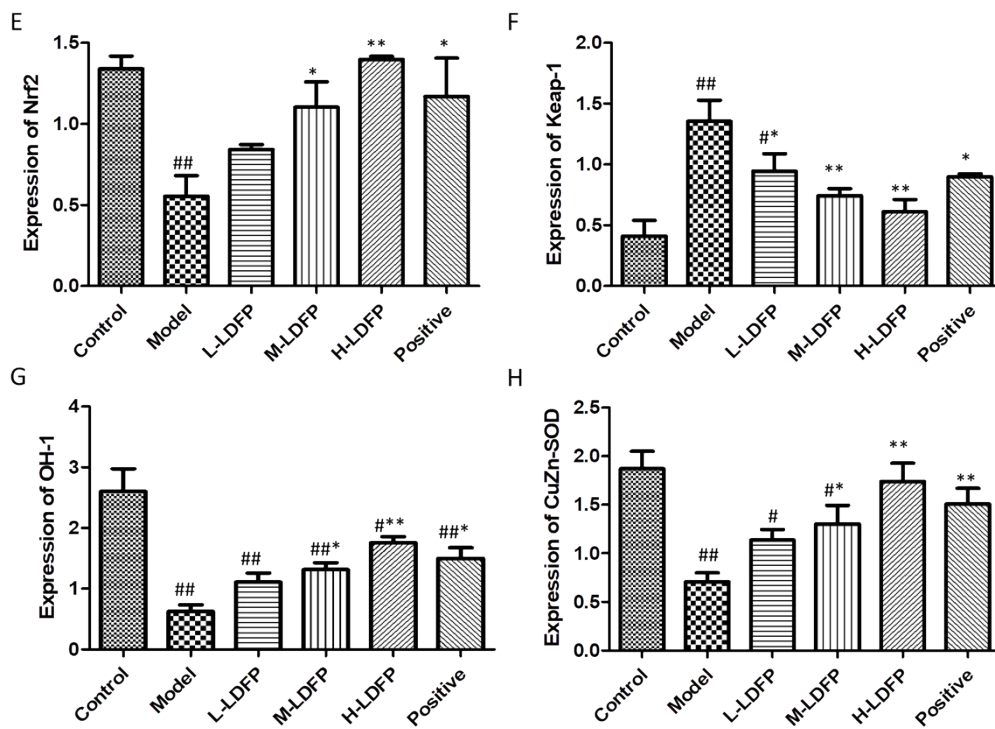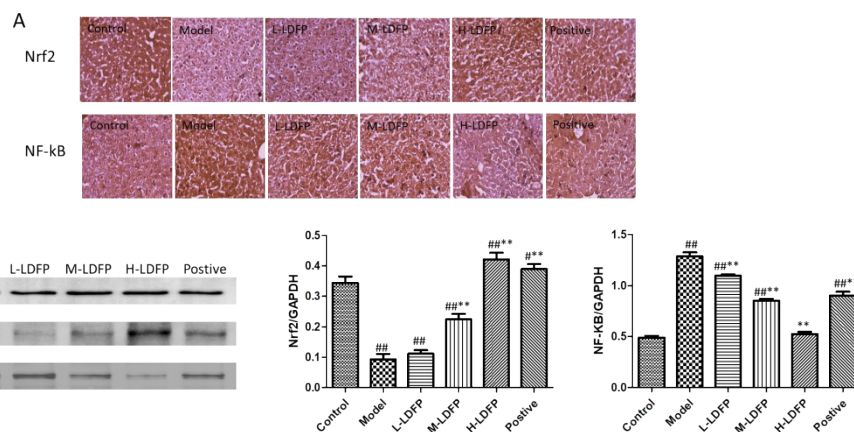

Fig. 7 Effect of LDFF on the expression of Nrf2 and NF-kB by and IHC staining and Western blot. Compared with blank group #P<0. 05; ## P < 0. 01; Compared with model group \*P<0. 05; \*\* P < 0. 01

Table3 Monosaccharide composition and content of *Lyophyllum decastes* fruiting body polysaccharide (μg/mg)

| Monose | Fuc    | D-GalN | Rha   | Ara   | GluN  | Gal     | Glc     | Xyl   | Man    | Rib   | Gal-UA | Gul-UA | Glc-UA |
|--------|--------|--------|-------|-------|-------|---------|---------|-------|--------|-------|--------|--------|--------|
| μg/mg  | 24.663 | 0.646  | 0.703 | 1.215 | 7.550 | 122.661 | 302.928 | 9.153 | 58.665 | 5.397 | 1.549  | 0.848  | 13.922 |

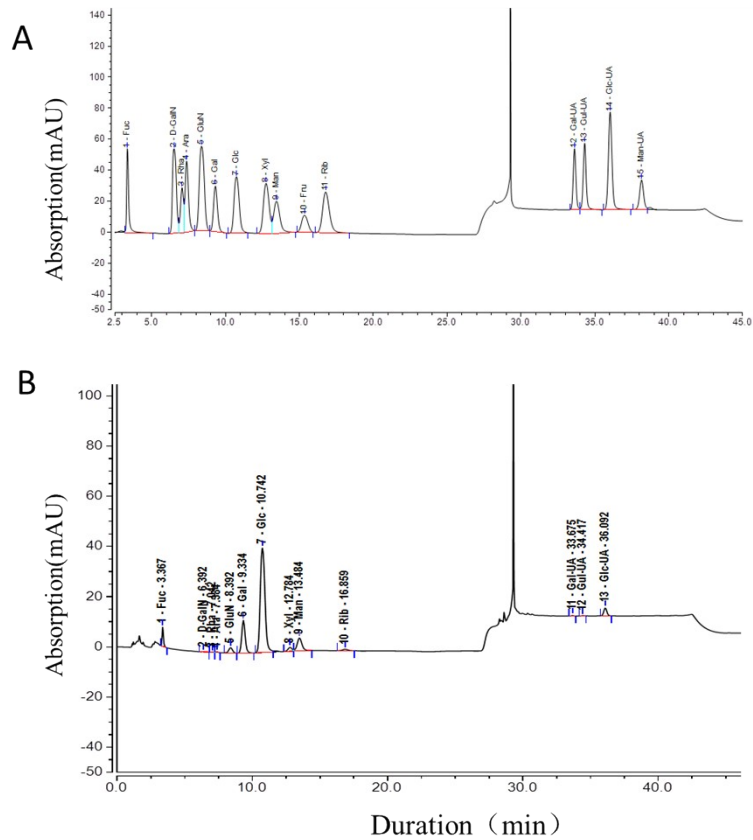

Fig. 8 (A) HPLC separation of Standard sample. (B) HPLC chromatograms of monosaccharides from *Lyophyllum decastes* fruiting body polysaccharide. 1: Fucose; 2: D-Glucosamine hydrochloride; 3: Rhamnose; 4: Arabinose, Glucosamine; 5: Galactose; 6: Glucose; 7: Xylose; 8: Mannose; 9: Fructose; 10: Ribose; 11: Galacturonic Acid; 12: Guluronic Acid; 13: Glucuronic Acid. The abscissa is the retention time of detection (Time, min), and the ordinate is the response value of ion detection (Response, nC).
